# Supplementary material for: Evidence for Autoinduction and Quorum Sensing in White Band Disease-Causing Microbes on Acropora cervicornis
Source: PubMed Central journal article supplement (PMC4457150; doi:10.1038/srep11134), 2015-06-05
Supplement: srep11134-s1.pdf [file srep11134-s1.pdf]

Evidence for Autoinduction and Quorum Sensing in White Band Disease-Causing Microbes on *Acropora cervicornis*

Rebecca H. Certner & Steven V. Vollmer

**Supplementary Table S1**

ANOVA table for *Cytophaga-Flavobacterium* dataset. Percent bacterial coverage per mg coral tissue plated was analysed with a two-way ANOVA that considered the CFCF in the media (healthy or diseased) and the plated bacterial homogenate (healthy or diseased) as fixed effects.

| <b>Source</b>                  | <b>Df</b> | <b>Sum Sq.</b> | <b>Mean Sq.</b> | <b>F-value</b> | <b>P-value</b> |
|--------------------------------|-----------|----------------|-----------------|----------------|----------------|
| CFCF (cell-free culture fluid) | 1         | 59,731         | 59,731          | 32.951         | 0.000434       |
| Bacterial Homogenate           | 1         | 339            | 339             | 0.817          | 0.677033       |
| CFCF:Bacterial Homogenate      | 1         | 3,738          | 3,738           | 2.062          | 0.188952       |
| Residuals                      | 8         | 14,502         | 14,502          | -              | -              |

**Supplementary Table S2**

ANOVA table for *Vibrio* dataset. Percent bacterial coverage per mg coral tissue plated was analysed with a two-way ANOVA that considered the CFCF in the media (healthy or diseased) and the plated bacterial homogenate (healthy or diseased) as fixed effects.

| <b>Source</b>                  | <b>Df</b> | <b>Sum Sq.</b> | <b>Mean Sq.</b> | <b>F-value</b> | <b>P-value</b> |
|--------------------------------|-----------|----------------|-----------------|----------------|----------------|
| CFCF (cell-free culture fluid) | 1         | 0.52           | 0.52            | 0.029          | 0.8697         |
| Bacterial Homogenate           | 1         | 141.69         | 141.69          | 7.835          | 0.0232         |
| CFCF:Bacterial Homogenate      | 1         | 0.52           | 0.52            | 0.029          | 0.8697         |
| Residuals                      | 8         | 144.67         | 18.08           | -              | -              |

**Supplementary Table S3**

ANOVA table for AHL Addition Experiment. Time to total tissue loss in healthy test *A. cervicornis* fragments was analysed with a two-way ANOVA that considered the bacterial homogenate (healthy or diseased) and the addition or lack of AHL as fixed effects.

| <b>Source</b>  | <b>Df</b> | <b>Sum Sq.</b> | <b>Mean Sq.</b> | <b>F-value</b> | <b>P-value</b> |
|----------------|-----------|----------------|-----------------|----------------|----------------|
| Homogenate     | 1         | 309.17         | 309.17          | 2508           | <2e-16         |
| AHL            | 1         | 162.56         | 162.56          | 1319           | <2e-16         |
| Homogenate:AHL | 1         | 180.01         | 180.01          | 1460           | <2e-16         |
| Residuals      | 32        | 3.94           | 0.12            | -              | -              |
